# Supplementary material for: Partitioning the Proteome: Phase Separation for Targeted Analysis of Membrane Proteins in Human Post-Mortem Brain
Source: PLoS One. 2012 Jun 22;7(6):e39509. doi: 10.1371/journal.pone.0039509 (PMC3382145; doi:10.1371/journal.pone.0039509)
Supplement: Table S8 — Proteins identified in Pt1 by LC-MS/MS. The protein Score, Mass, and number of Peptides identified for each protein are listed in columns D, E, and F respectively. (XLS) [file pone.0039509.s010.xls]

## Sheet: Table S8_Pt1 proteins
TABLE S8. PROTEINS IDENTIFIED IN Pt1
prot_hit_num	prot_acc	prot_desc	prot_score	prot_mass	prot_matches
31	TITIN_HUMAN	Titin OS=Homo sapiens GN=TTN PE=1 SV=2	162	3813810	74
3	TBA1B_HUMAN	Tubulin alpha-1B chain OS=Homo sapiens GN=TUBA1B PE=1 SV=1	518	50120	45
1	SPTB2_HUMAN	Spectrin beta chain, brain 1 OS=Homo sapiens GN=SPTBN1 PE=1 SV=2	733	274439	43
5	TBA4A_HUMAN	Tubulin alpha-4A chain OS=Homo sapiens GN=TUBA4A PE=1 SV=1	463	49892	43
6	TBB4_HUMAN	Tubulin beta-4 chain OS=Homo sapiens GN=TUBB4 PE=1 SV=2	423	49554	39
7	TBA3E_HUMAN	Tubulin alpha-3E chain OS=Homo sapiens GN=TUBA3E PE=1 SV=2	385	49827	39
2	SPTA2_HUMAN	Spectrin alpha chain, brain OS=Homo sapiens GN=SPTAN1 PE=1 SV=3	702	284364	30
14	TBB2C_HUMAN	Tubulin beta-2C chain OS=Homo sapiens GN=TUBB2C PE=1 SV=1	288	49799	30
33	SYNE1_HUMAN	Nesprin-1 OS=Homo sapiens GN=SYNE1 PE=1 SV=3	155	1010398	30
12	ACTB_HUMAN	Actin, cytoplasmic 1 OS=Homo sapiens GN=ACTB PE=1 SV=1	327	41710	26
30	STXB1_HUMAN	Syntaxin-binding protein 1 OS=Homo sapiens GN=STXBP1 PE=1 SV=1	163	67526	26
13	TBB2A_HUMAN	Tubulin beta-2A chain OS=Homo sapiens GN=TUBB2A PE=1 SV=1	327	49875	25
15	TBB2B_HUMAN	Tubulin beta-2B chain OS=Homo sapiens GN=TUBB2B PE=1 SV=1	273	49921	25
18	TBB5_HUMAN	Tubulin beta chain OS=Homo sapiens GN=TUBB PE=1 SV=2	244	49639	25
22	MBP_HUMAN	Myelin basic protein OS=Homo sapiens GN=MBP PE=1 SV=3	213	33097	25
4	GFAP_HUMAN	Glial fibrillary acidic protein OS=Homo sapiens GN=GFAP PE=1 SV=1	488	49850	22
17	ACTA_HUMAN	Actin, aortic smooth muscle OS=Homo sapiens GN=ACTA2 PE=1 SV=1	260	41982	20
55	PLEC1_HUMAN	Plectin-1 OS=Homo sapiens GN=PLEC1 PE=1 SV=3	90	531466	20
94	OBSCN_HUMAN	Obscurin OS=Homo sapiens GN=OBSCN PE=1 SV=3	59	867940	20
19	TBB6_HUMAN	Tubulin beta-6 chain OS=Homo sapiens GN=TUBB6 PE=1 SV=1	237	49825	19
16	CLH1_HUMAN	Clathrin heavy chain 1 OS=Homo sapiens GN=CLTC PE=1 SV=5	264	191493	18
24	NFM_HUMAN	Neurofilament medium polypeptide OS=Homo sapiens GN=NEFM PE=1 SV=3	201	102411	18
72	SRRM2_HUMAN	Serine/arginine repetitive matrix protein 2 OS=Homo sapiens GN=SRRM2 PE=1 SV=2	72	299438	18
32	CN37_HUMAN	2~,3~-cyclic-nucleotide 3~-phosphodiesterase OS=Homo sapiens GN=CNP PE=1 SV=2	159	47549	17
138	NEBU_HUMAN	Nebulin OS=Homo sapiens GN=NEB PE=1 SV=3	47	772454	17
8	DYN1_HUMAN	Dynamin-1 OS=Homo sapiens GN=DNM1 PE=1 SV=2	372	97347	16
69	BPA1_HUMAN	Bullous pemphigoid antigen 1 OS=Homo sapiens GN=DST PE=1 SV=4	75	860127	16
96	DESP_HUMAN	Desmoplakin OS=Homo sapiens GN=DSP PE=1 SV=3	57	331569	16
140	SYNE2_HUMAN	Nesprin-2 OS=Homo sapiens GN=SYNE2 PE=1 SV=3	47	795944	16
9	AINX_HUMAN	Alpha-internexin OS=Homo sapiens GN=INA PE=1 SV=2	345	55357	15
23	POTEE_HUMAN	POTE ankyrin domain family member E OS=Homo sapiens GN=POTEE PE=1 SV=3	204	121286	15
60	RYR1_HUMAN	Ryanodine receptor 1 OS=Homo sapiens GN=RYR1 PE=1 SV=3	82	564815	15
108	JHD2C_HUMAN	Probable JmjC domain-containing histone demethylation protein 2C OS=Homo sapiens GN=JMJD1C PE=1 SV=2	53	284349	15
10	KCRB_HUMAN	Creatine kinase B-type OS=Homo sapiens GN=CKB PE=1 SV=1	342	42617	14
27	POTEF_HUMAN	POTE ankyrin domain family member F OS=Homo sapiens GN=POTEF PE=1 SV=2	185	121367	14
62	MACF4_HUMAN	Microtubule-actin cross-linking factor 1, isoform 4 OS=Homo sapiens GN=MACF1 PE=1 SV=2	82	669721	14
63	MACF1_HUMAN	Microtubule-actin cross-linking factor 1, isoforms 1/2/3/5 OS=Homo sapiens GN=MACF1 PE=1 SV=3	81	620034	14
205	HBA_HUMAN	Hemoglobin subunit alpha OS=Homo sapiens GN=HBA1 PE=1 SV=2	39	15248	14
11	MAP1B_HUMAN	Microtubule-associated protein 1B OS=Homo sapiens GN=MAP1B PE=1 SV=1	337	270454	13
34	TBB3_HUMAN	Tubulin beta-3 chain OS=Homo sapiens GN=TUBB3 PE=1 SV=2	145	50400	13
84	CING_HUMAN	Cingulin OS=Homo sapiens GN=CGN PE=1 SV=2	64	136304	13
25	NFL_HUMAN	Neurofilament light polypeptide OS=Homo sapiens GN=NEFL PE=1 SV=3	194	61479	12
58	MINT_HUMAN	Msx2-interacting protein OS=Homo sapiens GN=SPEN PE=1 SV=1	86	402004	12
88	YM018_HUMAN	Uncharacterized protein FLJ40176 OS=Homo sapiens PE=2 SV=2	62	277778	12
295	KI67_HUMAN	Antigen KI-67 OS=Homo sapiens GN=MKI67 PE=1 SV=2	33	358474	12
37	ACTBL_HUMAN	Beta-actin-like protein 2 OS=Homo sapiens GN=ACTBL2 PE=1 SV=2	133	41976	11
65	BRCA2_HUMAN	Breast cancer type 2 susceptibility protein OS=Homo sapiens GN=BRCA2 PE=1 SV=2	81	383986	11
78	DYH5_HUMAN	Dynein heavy chain 5, axonemal OS=Homo sapiens GN=DNAH5 PE=1 SV=3	66	528684	11
113	STAR9_HUMAN	StAR-related lipid transfer protein 9 OS=Homo sapiens GN=STARD9 PE=2 SV=2	51	506435	11
125	GCN1L_HUMAN	Translational activator GCN1 OS=Homo sapiens GN=GCN1L1 PE=1 SV=6	50	292572	11
139	RYR2_HUMAN	Ryanodine receptor 2 OS=Homo sapiens GN=RYR2 PE=1 SV=2	47	564380	11
175	NCOR1_HUMAN	Nuclear receptor corepressor 1 OS=Homo sapiens GN=NCOR1 PE=1 SV=2	43	270044	11
301	TACC2_HUMAN	Transforming acidic coiled-coil-containing protein 2 OS=Homo sapiens GN=TACC2 PE=1 SV=3	32	309237	11
20	1433G_HUMAN	14-3-3 protein gamma OS=Homo sapiens GN=YWHAG PE=1 SV=2	224	28285	10
35	SPTN2_HUMAN	Spectrin beta chain, brain 2 OS=Homo sapiens GN=SPTBN2 PE=1 SV=2	137	271127	10
79	HYDIN_HUMAN	Hydrocephalus-inducing protein homolog OS=Homo sapiens GN=HYDIN PE=1 SV=2	66	575452	10
95	SEPT8_HUMAN	Septin-8 OS=Homo sapiens GN=SEPT8 PE=1 SV=4	59	55721	10
112	ANK3_HUMAN	Ankyrin-3 OS=Homo sapiens GN=ANK3 PE=1 SV=3	52	480113	10
123	DYH1_HUMAN	Dynein heavy chain 1, axonemal OS=Homo sapiens GN=DNAH1 PE=1 SV=3	50	493656	10
177	SMG1_HUMAN	Serine/threonine-protein kinase SMG1 OS=Homo sapiens GN=SMG1 PE=1 SV=2	42	410002	10
185	PRAX_HUMAN	Periaxin OS=Homo sapiens GN=PRX PE=1 SV=1	41	154906	10
187	ZC3HD_HUMAN	Zinc finger CCCH domain-containing protein 13 OS=Homo sapiens GN=ZC3H13 PE=1 SV=1	41	196519	10
207	APC_HUMAN	Adenomatous polyposis coli protein OS=Homo sapiens GN=APC PE=1 SV=2	39	311455	10
217	PCLO_HUMAN	Protein piccolo OS=Homo sapiens GN=PCLO PE=1 SV=3	38	566309	10
21	NSF_HUMAN	Vesicle-fusing ATPase OS=Homo sapiens GN=NSF PE=1 SV=3	213	82542	9
41	TBB4Q_HUMAN	Putative tubulin beta-4q chain OS=Homo sapiens GN=TUBB4Q PE=5 SV=1	118	48403	9
42	MYH10_HUMAN	Myosin-10 OS=Homo sapiens GN=MYH10 PE=1 SV=3	118	228858	9
76	CP250_HUMAN	Centrosome-associated protein CEP250 OS=Homo sapiens GN=CEP250 PE=1 SV=2	67	280967	9
83	DYH10_HUMAN	Dynein heavy chain 10, axonemal OS=Homo sapiens GN=DNAH10 PE=1 SV=4	64	514512	9
90	CO4A2_HUMAN	Collagen alpha-2(IV) chain OS=Homo sapiens GN=COL4A2 PE=1 SV=4	61	167449	9
92	MYO6_HUMAN	Myosin-VI OS=Homo sapiens GN=MYO6 PE=1 SV=4	61	149596	9
102	RBBP6_HUMAN	Retinoblastoma-binding protein 6 OS=Homo sapiens GN=RBBP6 PE=1 SV=1	54	201442	9
107	MAP2_HUMAN	Microtubule-associated protein 2 OS=Homo sapiens GN=MAP2 PE=1 SV=4	53	199404	9
109	NIPBL_HUMAN	Nipped-B-like protein OS=Homo sapiens GN=NIPBL PE=1 SV=2	52	315854	9
122	MYO9A_HUMAN	Myosin-IXa OS=Homo sapiens GN=MYO9A PE=1 SV=2	50	292522	9
126	BAHC1_HUMAN	BAH and coiled-coil domain-containing protein 1 OS=Homo sapiens GN=BAHCC1 PE=1 SV=3	49	276760	9
135	COCA1_HUMAN	Collagen alpha-1(XII) chain OS=Homo sapiens GN=COL12A1 PE=1 SV=2	48	332941	9
144	SEPT6_HUMAN	Septin-6 OS=Homo sapiens GN=SEPT6 PE=1 SV=4	46	49685	9
145	WDFY3_HUMAN	WD repeat and FYVE domain-containing protein 3 OS=Homo sapiens GN=WDFY3 PE=1 SV=2	46	395006	9
160	K0564_HUMAN	Uncharacterized protein KIAA0564 OS=Homo sapiens GN=KIAA0564 PE=1 SV=2	44	214689	9
162	PCD16_HUMAN	Protocadherin-16 OS=Homo sapiens GN=DCHS1 PE=2 SV=1	44	345971	9
166	PGBM_HUMAN	Basement membrane-specific heparan sulfate proteoglycan core protein OS=Homo sapiens GN=HSPG2 PE=1 SV=3	44	468501	9
179	COGA1_HUMAN	Collagen alpha-1(XVI) chain OS=Homo sapiens GN=COL16A1 PE=1 SV=2	42	157653	9
181	CENPF_HUMAN	Centromere protein F OS=Homo sapiens GN=CENPF PE=1 SV=2	42	367537	9
192	SHRM3_HUMAN	Protein Shroom3 OS=Homo sapiens GN=SHROOM3 PE=1 SV=1	40	216528	9
241	BSN_HUMAN	Protein bassoon OS=Homo sapiens GN=BSN PE=1 SV=4	36	416214	9
243	CROCC_HUMAN	Rootletin OS=Homo sapiens GN=CROCC PE=1 SV=1	36	228388	9
246	SAFB1_HUMAN	Scaffold attachment factor B1 OS=Homo sapiens GN=SAFB PE=1 SV=4	35	102580	9
306	NRAP_HUMAN	Nebulin-related-anchoring protein OS=Homo sapiens GN=NRAP PE=2 SV=2	32	196950	9
346	MCM5_HUMAN	DNA replication licensing factor MCM5 OS=Homo sapiens GN=MCM5 PE=1 SV=5	31	82233	9
354	MYH11_HUMAN	Myosin-11 OS=Homo sapiens GN=MYH11 PE=1 SV=3	31	227199	9
358	MYST4_HUMAN	Histone acetyltransferase MYST4 OS=Homo sapiens GN=MYST4 PE=1 SV=3	31	231232	9
359	PACS2_HUMAN	Phosphofurin acidic cluster sorting protein 2 OS=Homo sapiens GN=PACS2 PE=1 SV=3	31	97641	9
28	CNTN1_HUMAN	Contactin-1 OS=Homo sapiens GN=CNTN1 PE=1 SV=1	184	113249	8
29	KCC2A_HUMAN	Calcium/calmodulin-dependent protein kinase type II subunit alpha OS=Homo sapiens GN=CAMK2A PE=1 SV=2	179	54054	8
38	DYN3_HUMAN	Dynamin-3 OS=Homo sapiens GN=DNM3 PE=1 SV=4	132	97685	8
43	HS12A_HUMAN	Heat shock 70 kDa protein 12A OS=Homo sapiens GN=HSPA12A PE=1 SV=2	116	74932	8
46	TBB1_HUMAN	Tubulin beta-1 chain OS=Homo sapiens GN=TUBB1 PE=1 SV=1	112	50295	8
50	ANK2_HUMAN	Ankyrin-2 OS=Homo sapiens GN=ANK2 PE=1 SV=3	101	429990	8
73	GNAO_HUMAN	Guanine nucleotide-binding protein G(o) subunit alpha OS=Homo sapiens GN=GNAO1 PE=1 SV=4	70	40025	8
87	SVIL_HUMAN	Supervillin OS=Homo sapiens GN=SVIL PE=1 SV=2	62	247593	8
97	DCTN1_HUMAN	Dynactin subunit 1 OS=Homo sapiens GN=DCTN1 PE=1 SV=3	57	141607	8
104	NSD1_HUMAN	Histone-lysine N-methyltransferase, H3 lysine-36 and H4 lysine-20 specific OS=Homo sapiens GN=NSD1 PE=1 SV=1	54	296464	8
130	NEMO_HUMAN	NF-kappa-B essential modulator OS=Homo sapiens GN=IKBKG PE=1 SV=2	49	48167	8
132	DYH14_HUMAN	Dynein heavy chain 14, axonemal OS=Homo sapiens GN=DNAH14 PE=2 SV=3	49	399640	8
137	ZEP2_HUMAN	Transcription factor HIVEP2 OS=Homo sapiens GN=HIVEP2 PE=1 SV=2	48	268885	8
153	MYH2_HUMAN	Myosin-2 OS=Homo sapiens GN=MYH2 PE=1 SV=1	45	222906	8
165	SMC2_HUMAN	Structural maintenance of chromosomes protein 2 OS=Homo sapiens GN=SMC2 PE=1 SV=2	44	135572	8
169	SPTN5_HUMAN	Spectrin beta chain, brain 4 OS=Homo sapiens GN=SPTBN5 PE=1 SV=1	43	416579	8
172	LAMA3_HUMAN	Laminin subunit alpha-3 OS=Homo sapiens GN=LAMA3 PE=1 SV=2	43	366414	8
174	ASXL3_HUMAN	Putative Polycomb group protein ASXL3 OS=Homo sapiens GN=ASXL3 PE=2 SV=3	43	241767	8
191	ATRX_HUMAN	Transcriptional regulator ATRX OS=Homo sapiens GN=ATRX PE=1 SV=4	41	282349	8
200	DYH11_HUMAN	Dynein heavy chain 11, axonemal OS=Homo sapiens GN=DNAH11 PE=1 SV=2	39	520681	8
206	TRAF7_HUMAN	E3 ubiquitin-protein ligase TRAF7 OS=Homo sapiens GN=TRAF7 PE=1 SV=1	39	74561	8
210	DOCK8_HUMAN	Dedicator of cytokinesis protein 8 OS=Homo sapiens GN=DOCK8 PE=1 SV=3	39	238377	8
218	DYH8_HUMAN	Dynein heavy chain 8, axonemal OS=Homo sapiens GN=DNAH8 PE=1 SV=2	38	514335	8
222	ANR35_HUMAN	Ankyrin repeat domain-containing protein 35 OS=Homo sapiens GN=ANKRD35 PE=2 SV=2	37	109898	8
247	GRD2I_HUMAN	Delphilin OS=Homo sapiens GN=GRID2IP PE=2 SV=2	35	132194	8
251	PKD1_HUMAN	Polycystin-1 OS=Homo sapiens GN=PKD1 PE=1 SV=3	35	462239	8
260	GALT5_HUMAN	Polypeptide N-acetylgalactosaminyltransferase 5 OS=Homo sapiens GN=GALNT5 PE=1 SV=1	35	106199	8
268	KNL2_HUMAN	Kinetochore-associated protein KNL-2 homolog OS=Homo sapiens GN=KNL2 PE=1 SV=1	34	129005	8
270	SPTN4_HUMAN	Spectrin beta chain, brain 3 OS=Homo sapiens GN=SPTBN4 PE=1 SV=2	34	288808	8
283	ALMS1_HUMAN	Alstrom syndrome protein 1 OS=Homo sapiens GN=ALMS1 PE=1 SV=3	33	460683	8
289	RHG10_HUMAN	Rho GTPase-activating protein 10 OS=Homo sapiens GN=ARHGAP10 PE=1 SV=1	33	89318	8
298	IL1AP_HUMAN	Interleukin-1 receptor accessory protein OS=Homo sapiens GN=IL1RAP PE=1 SV=2	33	65377	8
342	TEP1_HUMAN	Telomerase protein component 1 OS=Homo sapiens GN=TEP1 PE=1 SV=2	31	290307	8
366	CASC5_HUMAN	Protein CASC5 OS=Homo sapiens GN=CASC5 PE=1 SV=3	30	265224	8
381	BIG2_HUMAN	Brefeldin A-inhibited guanine nucleotide-exchange protein 2 OS=Homo sapiens GN=ARFGEF2 PE=1 SV=3	30	201909	8
26	1433Z_HUMAN	14-3-3 protein zeta/delta OS=Homo sapiens GN=YWHAZ PE=1 SV=1	186	27728	7
39	ATPA_HUMAN	ATP synthase subunit alpha, mitochondrial OS=Homo sapiens GN=ATP5A1 PE=1 SV=1	130	59714	7
45	SYN1_HUMAN	Synapsin-1 OS=Homo sapiens GN=SYN1 PE=1 SV=3	112	74066	7
48	EF1A1_HUMAN	Elongation factor 1-alpha 1 OS=Homo sapiens GN=EEF1A1 PE=1 SV=1	105	50109	7
49	CO1A2_HUMAN	Collagen alpha-2(I) chain OS=Homo sapiens GN=COL1A2 PE=1 SV=7	103	129235	7
67	HS90B_HUMAN	Heat shock protein HSP 90-beta OS=Homo sapiens GN=HSP90AB1 PE=1 SV=4	78	83212	7
82	CASP_HUMAN	Protein CASP OS=Homo sapiens GN=CUX1 PE=1 SV=2	64	77408	7
91	CUX1_HUMAN	Homeobox protein cut-like 1 OS=Homo sapiens GN=CUX1 PE=1 SV=3	61	164087	7
117	HERC2_HUMAN	Probable E3 ubiquitin-protein ligase HERC2 OS=Homo sapiens GN=HERC2 PE=1 SV=1	50	527139	7
119	RREB1_HUMAN	Ras-responsive element-binding protein 1 OS=Homo sapiens GN=RREB1 PE=1 SV=3	50	181306	7
124	NEBL_HUMAN	Nebulette OS=Homo sapiens GN=NEBL PE=2 SV=1	50	116380	7
129	K0614_HUMAN	Probable E3 ubiquitin-protein ligase KIAA0614 OS=Homo sapiens GN=KIAA0614 PE=1 SV=4	49	327775	7
131	SYNEM_HUMAN	Synemin OS=Homo sapiens GN=SYNM PE=1 SV=2	49	172663	7
141	RAD50_HUMAN	DNA repair protein RAD50 OS=Homo sapiens GN=RAD50 PE=1 SV=1	47	153797	7
148	CKAP5_HUMAN	Cytoskeleton-associated protein 5 OS=Homo sapiens GN=CKAP5 PE=1 SV=3	46	225352	7
150	RAB10_HUMAN	Ras-related protein Rab-10 OS=Homo sapiens GN=RAB10 PE=1 SV=1	45	22527	7
154	ACACB_HUMAN	Acetyl-CoA carboxylase 2 OS=Homo sapiens GN=ACACB PE=1 SV=2	45	276379	7
155	TARA_HUMAN	TRIO and F-actin-binding protein OS=Homo sapiens GN=TRIOBP PE=1 SV=3	45	261217	7
163	NGAP_HUMAN	Ras GTPase-activating protein nGAP OS=Homo sapiens GN=RASAL2 PE=1 SV=2	44	128477	7
164	GRIK5_HUMAN	Glutamate receptor, ionotropic kainate 5 OS=Homo sapiens GN=GRIK5 PE=2 SV=2	44	109195	7
180	FLNC_HUMAN	Filamin-C OS=Homo sapiens GN=FLNC PE=1 SV=3	42	290841	7
186	PKHG1_HUMAN	Pleckstrin homology domain-containing family G member 1 OS=Homo sapiens GN=PLEKHG1 PE=1 SV=2	41	155343	7
193	HXK2_HUMAN	Hexokinase-2 OS=Homo sapiens GN=HK2 PE=1 SV=2	40	102313	7
201	CILP1_HUMAN	Cartilage intermediate layer protein 1 OS=Homo sapiens GN=CILP PE=1 SV=3	39	132539	7
212	RHG23_HUMAN	Rho GTPase-activating protein 23 OS=Homo sapiens GN=ARHGAP23 PE=1 SV=2	38	162092	7
215	PR285_HUMAN	Peroxisomal proliferator-activated receptor A-interacting complex 285 kDa protein OS=Homo sapiens GN=PRIC285 PE=1 SV=5	38	294511	7
219	LAMA2_HUMAN	Laminin subunit alpha-2 OS=Homo sapiens GN=LAMA2 PE=1 SV=4	38	343684	7
221	PRP4B_HUMAN	Serine/threonine-protein kinase PRP4 homolog OS=Homo sapiens GN=PRPF4B PE=1 SV=2	38	116902	7
226	CE350_HUMAN	Centrosome-associated protein 350 OS=Homo sapiens GN=CEP350 PE=1 SV=1	37	350716	7
230	K0649_HUMAN	Protein KIAA0649 OS=Homo sapiens GN=KIAA0649 PE=1 SV=1	37	127274	7
252	NVL_HUMAN	Nuclear valosin-containing protein-like OS=Homo sapiens GN=NVL PE=1 SV=1	35	94991	7
266	DYH7_HUMAN	Dynein heavy chain 7, axonemal OS=Homo sapiens GN=DNAH7 PE=1 SV=1	35	460846	7
278	EEA1_HUMAN	Early endosome antigen 1 OS=Homo sapiens GN=EEA1 PE=1 SV=2	34	162367	7
284	CO7A1_HUMAN	Collagen alpha-1(VII) chain OS=Homo sapiens GN=COL7A1 PE=1 SV=2	33	295041	7
286	PAFA2_HUMAN	Platelet-activating factor acetylhydrolase 2, cytoplasmic OS=Homo sapiens GN=PAFAH2 PE=1 SV=1	33	44007	7
294	NFH_HUMAN	Neurofilament heavy polypeptide OS=Homo sapiens GN=NEFH PE=1 SV=4	33	112411	7
309	PHF3_HUMAN	PHD finger protein 3 OS=Homo sapiens GN=PHF3 PE=1 SV=3	32	229339	7
324	ZN148_HUMAN	Zinc finger protein 148 OS=Homo sapiens GN=ZNF148 PE=1 SV=2	32	88921	7
328	SSPO_HUMAN	SCO-spondin OS=Homo sapiens GN=SSPO PE=2 SV=1	31	547133	7
341	HIP1_HUMAN	Huntingtin-interacting protein 1 OS=Homo sapiens GN=HIP1 PE=1 SV=5	31	116148	7
345	CC123_HUMAN	Coiled-coil domain-containing protein 123, mitochondrial OS=Homo sapiens GN=CCDC123 PE=1 SV=3	31	89534	7
350	CRML_HUMAN	Protein cramped-like OS=Homo sapiens GN=CRAMP1L PE=1 SV=2	31	135099	7
355	FAT3_HUMAN	Protocadherin Fat 3 OS=Homo sapiens GN=FAT3 PE=2 SV=2	31	505209	7
370	CAR11_HUMAN	Caspase recruitment domain-containing protein 11 OS=Homo sapiens GN=CARD11 PE=1 SV=3	30	133200	7
384	AN18A_HUMAN	Ankyrin repeat domain-containing protein 18A OS=Homo sapiens GN=ANKRD18A PE=1 SV=3	30	115525	7
386	NINL_HUMAN	Ninein-like protein OS=Homo sapiens GN=NINL PE=1 SV=2	30	156248	7
388	TRHY_HUMAN	Trichohyalin OS=Homo sapiens GN=TCHH PE=1 SV=2	30	253777	7
36	VIME_HUMAN	Vimentin OS=Homo sapiens GN=VIM PE=1 SV=4	135	53619	6
40	ADT2_HUMAN	ADP/ATP translocase 2 OS=Homo sapiens GN=SLC25A5 PE=1 SV=6	120	32874	6
47	E41L3_HUMAN	Band 4.1-like protein 3 OS=Homo sapiens GN=EPB41L3 PE=1 SV=2	109	120603	6
52	ADT3_HUMAN	ADP/ATP translocase 3 OS=Homo sapiens GN=SLC25A6 PE=1 SV=4	97	32845	6
57	EFTU_HUMAN	Elongation factor Tu, mitochondrial OS=Homo sapiens GN=TUFM PE=1 SV=2	88	49510	6
61	AT1A1_HUMAN	Sodium/potassium-transporting ATPase subunit alpha-1 OS=Homo sapiens GN=ATP1A1 PE=1 SV=1	82	112824	6
64	1433B_HUMAN	14-3-3 protein beta/alpha OS=Homo sapiens GN=YWHAB PE=1 SV=3	81	28065	6
70	H31T_HUMAN	Histone H3.1t OS=Homo sapiens GN=HIST3H3 PE=1 SV=3	74	15499	6
74	DYN2_HUMAN	Dynamin-2 OS=Homo sapiens GN=DNM2 PE=1 SV=2	69	98003	6
93	CTNA2_HUMAN	Catenin alpha-2 OS=Homo sapiens GN=CTNNA2 PE=1 SV=5	60	105247	6
115	RBM25_HUMAN	RNA-binding protein 25 OS=Homo sapiens GN=RBM25 PE=1 SV=3	51	100124	6
116	C8AP2_HUMAN	CASP8-associated protein 2 OS=Homo sapiens GN=CASP8AP2 PE=1 SV=1	50	222520	6
128	LMO7_HUMAN	LIM domain only protein 7 OS=Homo sapiens GN=LMO7 PE=1 SV=2	49	192590	6
142	CC114_HUMAN	Coiled-coil domain-containing protein 114 OS=Homo sapiens GN=CCDC114 PE=2 SV=3	46	75000	6
149	CTND1_HUMAN	Catenin delta-1 OS=Homo sapiens GN=CTNND1 PE=1 SV=1	45	108103	6
161	FHAD1_HUMAN	Forkhead-associated domain-containing protein 1 OS=Homo sapiens GN=FHAD1 PE=2 SV=2	44	161804	6
167	PRP16_HUMAN	Pre-mRNA-splicing factor ATP-dependent RNA helicase PRP16 OS=Homo sapiens GN=DHX38 PE=1 SV=2	44	140415	6
182	MA7D2_HUMAN	MAP7 domain-containing protein 2 OS=Homo sapiens GN=MAP7D2 PE=1 SV=2	42	81915	6
183	DYH9_HUMAN	Dynein heavy chain 9, axonemal OS=Homo sapiens GN=DNAH9 PE=1 SV=2	42	511579	6
184	SMCA2_HUMAN	Probable global transcription activator SNF2L2 OS=Homo sapiens GN=SMARCA2 PE=1 SV=2	42	181166	6
197	DPOLZ_HUMAN	DNA polymerase zeta catalytic subunit OS=Homo sapiens GN=REV3L PE=1 SV=2	40	352554	6
224	LUC7L_HUMAN	Putative RNA-binding protein Luc7-like 1 OS=Homo sapiens GN=LUC7L PE=1 SV=1	37	43701	6
228	RPC2_HUMAN	DNA-directed RNA polymerase III subunit RPC2 OS=Homo sapiens GN=POLR3B PE=1 SV=2	37	127702	6
231	CRYAB_HUMAN	Alpha-crystallin B chain OS=Homo sapiens GN=CRYAB PE=1 SV=2	36	20146	6
232	CA167_HUMAN	Uncharacterized protein C1orf167 OS=Homo sapiens GN=C1orf167 PE=2 SV=2	36	162321	6
234	MAP7_HUMAN	Ensconsin OS=Homo sapiens GN=MAP7 PE=1 SV=1	36	84002	6
249	GRIA1_HUMAN	Glutamate receptor 1 OS=Homo sapiens GN=GRIA1 PE=1 SV=2	35	101441	6
274	THOC2_HUMAN	THO complex subunit 2 OS=Homo sapiens GN=THOC2 PE=1 SV=2	34	182659	6
275	NCOR2_HUMAN	Nuclear receptor corepressor 2 OS=Homo sapiens GN=NCOR2 PE=1 SV=2	34	274635	6
277	MYO15_HUMAN	Myosin-XV OS=Homo sapiens GN=MYO15A PE=1 SV=2	34	395044	6
280	GLT14_HUMAN	Polypeptide N-acetylgalactosaminyltransferase 14 OS=Homo sapiens GN=GALNT14 PE=2 SV=1	33	64280	6
288	DOCK3_HUMAN	Dedicator of cytokinesis protein 3 OS=Homo sapiens GN=DOCK3 PE=1 SV=1	33	232954	6
292	HTSF1_HUMAN	HIV Tat-specific factor 1 OS=Homo sapiens GN=HTATSF1 PE=1 SV=1	33	85801	6
300	GSG1_HUMAN	Germ cell-specific gene 1 protein OS=Homo sapiens GN=GSG1 PE=2 SV=2	33	39222	6
313	RIPK1_HUMAN	Receptor-interacting serine/threonine-protein kinase 1 OS=Homo sapiens GN=RIPK1 PE=1 SV=3	32	75883	6
321	K0947_HUMAN	Uncharacterized protein KIAA0947 OS=Homo sapiens GN=KIAA0947 PE=1 SV=5	32	247737	6
322	HEAT1_HUMAN	HEAT repeat-containing protein 1 OS=Homo sapiens GN=HEATR1 PE=1 SV=3	32	242215	6
333	ASH1L_HUMAN	Probable histone-lysine N-methyltransferase ASH1L OS=Homo sapiens GN=ASH1L PE=1 SV=2	31	332582	6
338	CBX2_HUMAN	Chromobox protein homolog 2 OS=Homo sapiens GN=CBX2 PE=1 SV=2	31	56046	6
352	TRPM1_HUMAN	Transient receptor potential cation channel subfamily M member 1 OS=Homo sapiens GN=TRPM1 PE=1 SV=2	31	182062	6
361	K0753_HUMAN	Uncharacterized protein KIAA0753 OS=Homo sapiens GN=KIAA0753 PE=2 SV=3	31	109339	6
363	PKP4_HUMAN	Plakophilin-4 OS=Homo sapiens GN=PKP4 PE=1 SV=1	30	134186	6
385	GVIN1_HUMAN	Interferon-induced very large GTPase 1 OS=Homo sapiens GN=GVIN1 PE=2 SV=2	30	278871	6
53	H4_HUMAN	Histone H4 OS=Homo sapiens GN=HIST1H4A PE=1 SV=2	94	11360	5
54	VATA_HUMAN	V-type proton ATPase catalytic subunit A OS=Homo sapiens GN=ATP6V1A PE=1 SV=2	94	68260	5
89	AT2B1_HUMAN	Plasma membrane calcium-transporting ATPase 1 OS=Homo sapiens GN=ATP2B1 PE=1 SV=3	61	138668	5
98	DESM_HUMAN	Desmin OS=Homo sapiens GN=DES PE=1 SV=3	57	53503	5
101	IMMT_HUMAN	Mitochondrial inner membrane protein OS=Homo sapiens GN=IMMT PE=1 SV=1	55	83626	5
110	MAP1A_HUMAN	Microtubule-associated protein 1A OS=Homo sapiens GN=MAP1A PE=1 SV=5	52	305440	5
134	XIRP2_HUMAN	Xin actin-binding repeat-containing protein 2 OS=Homo sapiens GN=XIRP2 PE=1 SV=2	48	382063	5
136	MYO1B_HUMAN	Myosin-Ib OS=Homo sapiens GN=MYO1B PE=1 SV=3	48	131902	5
156	CLCB_HUMAN	Clathrin light chain B OS=Homo sapiens GN=CLTB PE=1 SV=1	45	25175	5
157	NALP9_HUMAN	NACHT, LRR and PYD domains-containing protein 9 OS=Homo sapiens GN=NLRP9 PE=2 SV=1	45	113238	5
159	SNPC4_HUMAN	snRNA-activating protein complex subunit 4 OS=Homo sapiens GN=SNAPC4 PE=1 SV=1	44	159335	5
170	KDM5C_HUMAN	Lysine-specific demethylase 5C OS=Homo sapiens GN=KDM5C PE=1 SV=2	43	175609	5
171	FRPD2_HUMAN	FERM and PDZ domain-containing protein 2 OS=Homo sapiens GN=FRMPD2 PE=1 SV=2	43	144218	5
178	YTDC2_HUMAN	Probable ATP-dependent RNA helicase YTHDC2 OS=Homo sapiens GN=YTHDC2 PE=1 SV=2	42	160147	5
188	LTBP1_HUMAN	Latent-transforming growth factor beta-binding protein 1 OS=Homo sapiens GN=LTBP1 PE=1 SV=4	41	186673	5
190	CENPJ_HUMAN	Centromere protein J OS=Homo sapiens GN=CENPJ PE=1 SV=2	41	152906	5
198	CNTP1_HUMAN	Contactin-associated protein 1 OS=Homo sapiens GN=CNTNAP1 PE=1 SV=1	40	156167	5
208	DPYL2_HUMAN	Dihydropyrimidinase-related protein 2 OS=Homo sapiens GN=DPYSL2 PE=1 SV=1	39	62255	5
213	SETX_HUMAN	Probable helicase senataxin OS=Homo sapiens GN=SETX PE=1 SV=4	38	302689	5
227	ATAD5_HUMAN	ATPase family AAA domain-containing protein 5 OS=Homo sapiens GN=ATAD5 PE=1 SV=4	37	207441	5
233	LRRK2_HUMAN	Leucine-rich repeat serine/threonine-protein kinase 2 OS=Homo sapiens GN=LRRK2 PE=1 SV=2	36	285919	5
242	SRCAP_HUMAN	Helicase SRCAP OS=Homo sapiens GN=SRCAP PE=1 SV=3	36	343343	5
245	TSG10_HUMAN	Testis-specific gene 10 protein OS=Homo sapiens GN=TSGA10 PE=1 SV=1	36	81370	5
253	CP27A_HUMAN	Sterol 26-hydroxylase, mitochondrial OS=Homo sapiens GN=CYP27A1 PE=1 SV=1	35	60196	5
255	CHD9_HUMAN	Chromodomain-helicase-DNA-binding protein 9 OS=Homo sapiens GN=CHD9 PE=1 SV=2	35	325819	5
258	FBF1_HUMAN	Fas-binding factor 1 OS=Homo sapiens GN=FBF1 PE=1 SV=2	35	125370	5
259	MYO7A_HUMAN	Myosin-VIIa OS=Homo sapiens GN=MYO7A PE=1 SV=1	35	254245	5
262	PLCH1_HUMAN	1-phosphatidylinositol-4,5-bisphosphate phosphodiesterase eta-1 OS=Homo sapiens GN=PLCH1 PE=1 SV=1	35	189104	5
269	RHG29_HUMAN	Rho GTPase-activating protein 29 OS=Homo sapiens GN=ARHGAP29 PE=1 SV=2	34	141974	5
290	ZCH18_HUMAN	Zinc finger CCCH domain-containing protein 18 OS=Homo sapiens GN=ZC3H18 PE=1 SV=2	33	106316	5
291	TCEA2_HUMAN	Transcription elongation factor A protein 2 OS=Homo sapiens GN=TCEA2 PE=1 SV=1	33	33579	5
296	NBEL2_HUMAN	Neurobeachin-like protein 2 OS=Homo sapiens GN=NBEAL2 PE=1 SV=2	33	302326	5
299	PTPRB_HUMAN	Receptor-type tyrosine-protein phosphatase beta OS=Homo sapiens GN=PTPRB PE=1 SV=2	33	224188	5
304	QN1_HUMAN	Protein QN1 homolog OS=Homo sapiens GN=KIAA1009 PE=1 SV=2	32	161843	5
311	TDRD6_HUMAN	Tudor domain-containing protein 6 OS=Homo sapiens GN=TDRD6 PE=2 SV=2	32	236367	5
312	ITPR3_HUMAN	Inositol 1,4,5-trisphosphate receptor type 3 OS=Homo sapiens GN=ITPR3 PE=1 SV=2	32	303912	5
314	TOPB1_HUMAN	DNA topoisomerase 2-binding protein 1 OS=Homo sapiens GN=TOPBP1 PE=1 SV=3	32	170571	5
319	SI1L1_HUMAN	Signal-induced proliferation-associated 1-like protein 1 OS=Homo sapiens GN=SIPA1L1 PE=1 SV=4	32	199904	5
327	KDM4A_HUMAN	Lysine-specific demethylase 4A OS=Homo sapiens GN=KDM4A PE=1 SV=1	31	120643	5
329	POK4_HUMAN	HERV-K_6q14.1 provirus ancestral Gag-Pol polyprotein OS=Homo sapiens PE=3 SV=3	31	123542	5
332	ITPR1_HUMAN	Inositol 1,4,5-trisphosphate receptor type 1 OS=Homo sapiens GN=ITPR1 PE=1 SV=2	31	313745	5
335	PXDN_HUMAN	Peroxidasin homolog OS=Homo sapiens GN=PXDN PE=1 SV=2	31	165170	5
344	SETD2_HUMAN	Histone-lysine N-methyltransferase SETD2 OS=Homo sapiens GN=SETD2 PE=1 SV=3	31	287418	5
348	SMRC1_HUMAN	SWI/SNF complex subunit SMARCC1 OS=Homo sapiens GN=SMARCC1 PE=1 SV=3	31	122790	5
367	MDN1_HUMAN	Midasin OS=Homo sapiens GN=MDN1 PE=1 SV=2	30	632420	5
368	MYO3B_HUMAN	Myosin-IIIb OS=Homo sapiens GN=MYO3B PE=2 SV=4	30	151733	5
371	CCD25_HUMAN	Coiled-coil domain-containing protein 25 OS=Homo sapiens GN=CCDC25 PE=1 SV=2	30	24463	5
374	CB039_HUMAN	UPF0407 protein C2orf39 OS=Homo sapiens GN=C2orf39 PE=2 SV=2	30	87080	5
391	ASTN1_HUMAN	Astrotactin-1 OS=Homo sapiens GN=ASTN1 PE=1 SV=3	30	144820	5
44	KCC2B_HUMAN	Calcium/calmodulin-dependent protein kinase type II subunit beta OS=Homo sapiens GN=CAMK2B PE=1 SV=2	114	72681	4
51	AT1A3_HUMAN	Sodium/potassium-transporting ATPase subunit alpha-3 OS=Homo sapiens GN=ATP1A3 PE=1 SV=3	100	111677	4
56	H2AV_HUMAN	Histone H2A.V OS=Homo sapiens GN=H2AFV PE=1 SV=3	89	13501	4
59	H2AZ_HUMAN	Histone H2A.Z OS=Homo sapiens GN=H2AFZ PE=1 SV=2	85	13545	4
68	AT1A2_HUMAN	Sodium/potassium-transporting ATPase subunit alpha-2 OS=Homo sapiens GN=ATP1A2 PE=1 SV=1	77	112193	4
75	H12_HUMAN	Histone H1.2 OS=Homo sapiens GN=HIST1H1C PE=1 SV=2	67	21352	4
77	ACTN1_HUMAN	Alpha-actinin-1 OS=Homo sapiens GN=ACTN1 PE=1 SV=2	67	102993	4
80	ROA3_HUMAN	Heterogeneous nuclear ribonucleoprotein A3 OS=Homo sapiens GN=HNRNPA3 PE=1 SV=2	66	39571	4
86	RUFY3_HUMAN	Protein RUFY3 OS=Homo sapiens GN=RUFY3 PE=1 SV=1	63	52931	4
111	SYT1_HUMAN	Synaptotagmin-1 OS=Homo sapiens GN=SYT1 PE=1 SV=1	52	47543	4
118	RNC_HUMAN	Ribonuclease 3 OS=Homo sapiens GN=RNASEN PE=1 SV=2	50	159214	4
120	GBB1_HUMAN	Guanine nucleotide-binding protein G(I)/G(S)/G(T) subunit beta-1 OS=Homo sapiens GN=GNB1 PE=1 SV=3	50	37353	4
133	AGAP1_HUMAN	Arf-GAP with GTPase, ANK repeat and PH domain-containing protein 1 OS=Homo sapiens GN=AGAP1 PE=1 SV=4	49	94411	4
168	GNAI2_HUMAN	Guanine nucleotide-binding protein G(i) subunit alpha-2 OS=Homo sapiens GN=GNAI2 PE=1 SV=3	44	40425	4
189	WIZ_HUMAN	Protein Wiz OS=Homo sapiens GN=WIZ PE=1 SV=2	41	178563	4
194	MYST3_HUMAN	Histone acetyltransferase MYST3 OS=Homo sapiens GN=MYST3 PE=1 SV=2	40	224886	4
196	E2AK4_HUMAN	Eukaryotic translation initiation factor 2-alpha kinase 4 OS=Homo sapiens GN=EIF2AK4 PE=1 SV=3	40	186794	4
204	THYG_HUMAN	Thyroglobulin OS=Homo sapiens GN=TG PE=1 SV=5	39	304594	4
211	GG8L1_HUMAN	Golgin subfamily A member 8-like protein 1 OS=Homo sapiens PE=3 SV=2	38	71286	4
220	DIAP3_HUMAN	Protein diaphanous homolog 3 OS=Homo sapiens GN=DIAPH3 PE=1 SV=4	38	136839	4
235	RBM28_HUMAN	RNA-binding protein 28 OS=Homo sapiens GN=RBM28 PE=1 SV=3	36	85685	4
236	K0644_HUMAN	Leucine-rich repeat-containing protein KIAA0644 OS=Homo sapiens GN=KIAA0644 PE=2 SV=1	36	88641	4
239	RGRF2_HUMAN	Ras-specific guanine nucleotide-releasing factor 2 OS=Homo sapiens GN=RASGRF2 PE=1 SV=2	36	140675	4
250	PTPRU_HUMAN	Receptor-type tyrosine-protein phosphatase U OS=Homo sapiens GN=PTPRU PE=1 SV=2	35	162320	4
254	CENPH_HUMAN	Centromere protein H OS=Homo sapiens GN=CENPH PE=1 SV=1	35	28463	4
256	ATS3_HUMAN	A disintegrin and metalloproteinase with thrombospondin motifs 3 OS=Homo sapiens GN=ADAMTS3 PE=2 SV=3	35	135487	4
257	ZN276_HUMAN	Zinc finger protein 276 OS=Homo sapiens GN=ZNF276 PE=1 SV=4	35	67176	4
261	UTP20_HUMAN	Small subunit processome component 20 homolog OS=Homo sapiens GN=UTP20 PE=1 SV=3	35	318182	4
263	EH1L1_HUMAN	EH domain-binding protein 1-like protein 1 OS=Homo sapiens GN=EHBP1L1 PE=1 SV=2	35	161756	4
264	ERC6L_HUMAN	DNA excision repair protein ERCC-6-like OS=Homo sapiens GN=ERCC6L PE=1 SV=1	35	141015	4
273	MCM4_HUMAN	DNA replication licensing factor MCM4 OS=Homo sapiens GN=MCM4 PE=1 SV=5	34	96498	4
279	CA106_HUMAN	Uncharacterized protein C1orf106 OS=Homo sapiens GN=C1orf106 PE=2 SV=1	34	72816	4
281	FYV1_HUMAN	1-phosphatidylinositol-3-phosphate 5-kinase OS=Homo sapiens GN=PIKFYVE PE=1 SV=2	33	236958	4
282	TEX11_HUMAN	Testis-expressed sequence 11 protein OS=Homo sapiens GN=TEX11 PE=1 SV=3	33	107819	4
287	STAG1_HUMAN	Cohesin subunit SA-1 OS=Homo sapiens GN=STAG1 PE=1 SV=3	33	144336	4
293	KI13B_HUMAN	Kinesin-like protein KIF13B OS=Homo sapiens GN=KIF13B PE=1 SV=1	33	202540	4
302	ATAD2_HUMAN	ATPase family AAA domain-containing protein 2 OS=Homo sapiens GN=ATAD2 PE=1 SV=1	32	158456	4
303	SPAST_HUMAN	Spastin OS=Homo sapiens GN=SPAST PE=1 SV=1	32	67155	4
305	K1731_HUMAN	Leucine-rich repeat-containing protein KIAA1731 OS=Homo sapiens GN=KIAA1731 PE=2 SV=4	32	294996	4
315	DNJC1_HUMAN	DnaJ homolog subfamily C member 1 OS=Homo sapiens GN=DNAJC1 PE=1 SV=1	32	63843	4
317	CELR3_HUMAN	Cadherin EGF LAG seven-pass G-type receptor 3 OS=Homo sapiens GN=CELSR3 PE=1 SV=2	32	357961	4
318	NAC2_HUMAN	Sodium/calcium exchanger 2 OS=Homo sapiens GN=SLC8A2 PE=2 SV=2	32	100304	4
325	SMBP2_HUMAN	DNA-binding protein SMUBP-2 OS=Homo sapiens GN=IGHMBP2 PE=1 SV=2	32	109056	4
330	RTTN_HUMAN	Rotatin OS=Homo sapiens GN=RTTN PE=1 SV=3	31	248470	4
331	Z3H7A_HUMAN	Zinc finger CCCH domain-containing protein 7A OS=Homo sapiens GN=ZC3H7A PE=1 SV=1	31	110466	4
336	MYH7_HUMAN	Myosin-7 OS=Homo sapiens GN=MYH7 PE=1 SV=5	31	222959	4
337	MGAP_HUMAN	MAX gene-associated protein OS=Homo sapiens GN=MGA PE=1 SV=2	31	331617	4
340	GAPD1_HUMAN	GTPase-activating protein and VPS9 domain-containing protein 1 OS=Homo sapiens GN=GAPVD1 PE=1 SV=2	31	164876	4
351	RABE1_HUMAN	Rab GTPase-binding effector protein 1 OS=Homo sapiens GN=RABEP1 PE=1 SV=2	31	99229	4
357	ZC3H1_HUMAN	Zinc finger C3H1 domain-containing protein OS=Homo sapiens GN=ZFC3H1 PE=1 SV=3	31	226214	4
360	NPAT_HUMAN	Protein NPAT OS=Homo sapiens GN=NPAT PE=1 SV=3	31	154195	4
362	CF204_HUMAN	Coiled-coil domain-containing protein C6orf204 OS=Homo sapiens GN=C6orf204 PE=2 SV=1	31	91751	4
364	PLBL2_HUMAN	Putative phospholipase B-like 2 OS=Homo sapiens GN=PLBD2 PE=1 SV=2	30	65430	4
365	PERQ2_HUMAN	PERQ amino acid-rich with GYF domain-containing protein 2 OS=Homo sapiens GN=GIGYF2 PE=1 SV=1	30	149978	4
369	ZRAB3_HUMAN	Zinc finger Ran-binding domain-containing protein 3 OS=Homo sapiens GN=ZRANB3 PE=2 SV=2	30	123170	4
373	ASND1_HUMAN	Asparagine synthetase domain-containing protein 1 OS=Homo sapiens GN=ASNSD1 PE=2 SV=1	30	72133	4
375	RBM6_HUMAN	RNA-binding protein 6 OS=Homo sapiens GN=RBM6 PE=1 SV=5	30	128565	4
377	DMD_HUMAN	Dystrophin OS=Homo sapiens GN=DMD PE=1 SV=2	30	426426	4
380	DEN2D_HUMAN	DENN domain-containing protein 2D OS=Homo sapiens GN=DENND2D PE=2 SV=2	30	53638	4
382	ODO1_HUMAN	2-oxoglutarate dehydrogenase, mitochondrial OS=Homo sapiens GN=OGDH PE=1 SV=3	30	115861	4
66	CAMKV_HUMAN	CaM kinase-like vesicle-associated protein OS=Homo sapiens GN=CAMKV PE=2 SV=2	79	54320	3
81	RP3A_HUMAN	Rabphilin-3A OS=Homo sapiens GN=RPH3A PE=1 SV=1	65	76824	3
103	LSAMP_HUMAN	Limbic system-associated membrane protein OS=Homo sapiens GN=LSAMP PE=1 SV=2	54	37370	3
105	VATE1_HUMAN	V-type proton ATPase subunit E 1 OS=Homo sapiens GN=ATP6V1E1 PE=1 SV=1	53	26129	3
114	1433F_HUMAN	14-3-3 protein eta OS=Homo sapiens GN=YWHAH PE=1 SV=4	51	28201	3
127	ATPO_HUMAN	ATP synthase subunit O, mitochondrial OS=Homo sapiens GN=ATP5O PE=1 SV=1	49	23263	3
146	SEPT7_HUMAN	Septin-7 OS=Homo sapiens GN=SEPT7 PE=1 SV=2	46	50648	3
147	B3A2_HUMAN	Anion exchange protein 2 OS=Homo sapiens GN=SLC4A2 PE=1 SV=4	46	136923	3
151	VATE2_HUMAN	V-type proton ATPase subunit E 2 OS=Homo sapiens GN=ATP6V1E2 PE=1 SV=1	45	26058	3
152	ADCY1_HUMAN	Adenylate cyclase type 1 OS=Homo sapiens GN=ADCY1 PE=1 SV=2	45	123360	3
158	AT5F1_HUMAN	ATP synthase subunit b, mitochondrial OS=Homo sapiens GN=ATP5F1 PE=1 SV=2	44	28890	3
173	ATP5H_HUMAN	ATP synthase subunit d, mitochondrial OS=Homo sapiens GN=ATP5H PE=1 SV=3	43	18480	3
195	AP3D1_HUMAN	AP-3 complex subunit delta-1 OS=Homo sapiens GN=AP3D1 PE=1 SV=1	40	130076	3
202	BASP1_HUMAN	Brain acid soluble protein 1 OS=Homo sapiens GN=BASP1 PE=1 SV=2	39	22680	3
203	CHPF2_HUMAN	Chondroitin sulfate glucuronyltransferase OS=Homo sapiens GN=CHPF2 PE=2 SV=2	39	85894	3
209	HBB_HUMAN	Hemoglobin subunit beta OS=Homo sapiens GN=HBB PE=1 SV=2	39	15988	3
214	ACAD9_HUMAN	Acyl-CoA dehydrogenase family member 9, mitochondrial OS=Homo sapiens GN=ACAD9 PE=1 SV=1	38	68717	3
216	TRNT1_HUMAN	tRNA-nucleotidyltransferase 1, mitochondrial OS=Homo sapiens GN=TRNT1 PE=1 SV=2	38	50096	3
223	C2C2L_HUMAN	C2 domain-containing protein 2-like OS=Homo sapiens GN=C2CD2L PE=1 SV=3	37	76134	3
225	ADCY8_HUMAN	Adenylate cyclase type 8 OS=Homo sapiens GN=ADCY8 PE=1 SV=1	37	140033	3
229	SON_HUMAN	Protein SON OS=Homo sapiens GN=SON PE=1 SV=4	37	263664	3
237	WDR76_HUMAN	WD repeat-containing protein 76 OS=Homo sapiens GN=WDR76 PE=1 SV=1	36	69709	3
238	K2C4_HUMAN	Keratin, type II cytoskeletal 4 OS=Homo sapiens GN=KRT4 PE=1 SV=4	36	57250	3
267	CBX7_HUMAN	Chromobox protein homolog 7 OS=Homo sapiens GN=CBX7 PE=1 SV=1	34	28323	3
272	RNF43_HUMAN	RING finger protein 43 OS=Homo sapiens GN=RNF43 PE=1 SV=1	34	85668	3
297	BCLF1_HUMAN	Bcl-2-associated transcription factor 1 OS=Homo sapiens GN=BCLAF1 PE=1 SV=2	33	106059	3
307	AIFM1_HUMAN	Apoptosis-inducing factor 1, mitochondrial OS=Homo sapiens GN=AIFM1 PE=1 SV=1	32	66859	3
308	DEN2A_HUMAN	DENN domain-containing protein 2A OS=Homo sapiens GN=DENND2A PE=2 SV=4	32	113782	3
320	LIPB1_HUMAN	Liprin-beta-1 OS=Homo sapiens GN=PPFIBP1 PE=1 SV=2	32	113952	3
323	ARP2_HUMAN	Actin-related protein 2 OS=Homo sapiens GN=ACTR2 PE=1 SV=1	32	44732	3
326	TIGD6_HUMAN	Tigger transposable element-derived protein 6 OS=Homo sapiens GN=TIGD6 PE=2 SV=2	32	58619	3
339	SET1B_HUMAN	Histone-lysine N-methyltransferase SETD1B OS=Homo sapiens GN=SETD1B PE=1 SV=2	31	208601	3
349	MO4L2_HUMAN	Mortality factor 4-like protein 2 OS=Homo sapiens GN=MORF4L2 PE=1 SV=1	31	32288	3
356	CAC1B_HUMAN	Voltage-dependent N-type calcium channel subunit alpha-1B OS=Homo sapiens GN=CACNA1B PE=1 SV=1	31	262329	3
372	MYH6_HUMAN	Myosin-6 OS=Homo sapiens GN=MYH6 PE=1 SV=4	30	223595	3
378	MFHA1_HUMAN	Malignant fibrous histiocytoma-amplified sequence 1 OS=Homo sapiens GN=MFHAS1 PE=1 SV=2	30	116877	3
379	NCKX1_HUMAN	Sodium/potassium/calcium exchanger 1 OS=Homo sapiens GN=SLC24A1 PE=1 SV=1	30	121297	3
383	F193A_HUMAN	Protein FAM193A OS=Homo sapiens GN=FAM193A PE=1 SV=2	30	139901	3
390	YB011_HUMAN	Uncharacterized protein FLJ46347 OS=Homo sapiens PE=2 SV=1	30	53584	3
392	ATL3_HUMAN	ADAMTS-like protein 3 OS=Homo sapiens GN=ADAMTSL3 PE=2 SV=3	30	188521	3
393	ADAS_HUMAN	Alkyldihydroxyacetonephosphate synthase, peroxisomal OS=Homo sapiens GN=AGPS PE=1 SV=1	30	72866	3
395	RAB44_HUMAN	Ras-related protein Rab-44 OS=Homo sapiens GN=RAB44 PE=3 SV=2	30	77321	3
71	K1045_HUMAN	Protein KIAA1045 OS=Homo sapiens GN=KIAA1045 PE=1 SV=2	73	45163	2
85	1433T_HUMAN	14-3-3 protein theta OS=Homo sapiens GN=YWHAQ PE=1 SV=1	63	27747	2
106	ROA1_HUMAN	Heterogeneous nuclear ribonucleoprotein A1 OS=Homo sapiens GN=HNRNPA1 PE=1 SV=5	53	38723	2
143	SNG3_HUMAN	Synaptogyrin-3 OS=Homo sapiens GN=SYNGR3 PE=2 SV=2	46	24539	2
176	ATP4A_HUMAN	Potassium-transporting ATPase alpha chain 1 OS=Homo sapiens GN=ATP4A PE=2 SV=5	42	114045	2
199	H10_HUMAN	Histone H1.0 OS=Homo sapiens GN=H1F0 PE=1 SV=3	40	20850	2
240	O4F21_HUMAN	Olfactory receptor 4F21 OS=Homo sapiens GN=OR4F21 PE=2 SV=2	36	35070	2
244	K6PP_HUMAN	6-phosphofructokinase type C OS=Homo sapiens GN=PFKP PE=1 SV=2	36	85542	2
248	GAS7_HUMAN	Growth arrest-specific protein 7 OS=Homo sapiens GN=GAS7 PE=1 SV=3	35	54337	2
265	DCLK1_HUMAN	Serine/threonine-protein kinase DCLK1 OS=Homo sapiens GN=DCLK1 PE=1 SV=2	35	82173	2
271	ACTN2_HUMAN	Alpha-actinin-2 OS=Homo sapiens GN=ACTN2 PE=1 SV=1	34	103788	2
276	MPCP_HUMAN	Phosphate carrier protein, mitochondrial OS=Homo sapiens GN=SLC25A3 PE=1 SV=2	34	40069	2
310	TFAM_HUMAN	Transcription factor A, mitochondrial OS=Homo sapiens GN=TFAM PE=1 SV=1	32	29078	2
316	RIPL1_HUMAN	RILP-like protein 1 OS=Homo sapiens GN=RILPL1 PE=1 SV=1	32	47079	2
334	UBA6_HUMAN	Ubiquitin-like modifier-activating enzyme 6 OS=Homo sapiens GN=UBA6 PE=1 SV=1	31	117895	2
343	TMOD2_HUMAN	Tropomodulin-2 OS=Homo sapiens GN=TMOD2 PE=1 SV=1	31	39571	2
347	DP13A_HUMAN	DCC-interacting protein 13-alpha OS=Homo sapiens GN=APPL1 PE=1 SV=1	31	79614	2
353	IF44L_HUMAN	Interferon-induced protein 44-like OS=Homo sapiens GN=IFI44L PE=2 SV=3	31	51289	2
376	BFSP1_HUMAN	Filensin OS=Homo sapiens GN=BFSP1 PE=1 SV=3	30	74499	2
387	SPG17_HUMAN	Sperm-associated antigen 17 OS=Homo sapiens GN=SPAG17 PE=1 SV=1	30	251584	2
389	MTL13_HUMAN	Methyltransferase-like protein 13 OS=Homo sapiens GN=METTL13 PE=1 SV=1	30	78718	2
394	CE164_HUMAN	Centrosomal protein of 164 kDa OS=Homo sapiens GN=CEP164 PE=1 SV=3	30	164214	2
